# Cultural transmission, competition for prey, and the evolution of cooperative hunting

Talia Borofsky<sup>1</sup>, Marcus W. Feldman<sup>1,\*</sup>, and Yoav Ram<sup>2,3,\*</sup>

<sup>1</sup>Department of Biology, Stanford University, Stanford, CA, USA

<sup>2</sup>School of Zoology, Faculty of Life Sciences, Tel Aviv University, Tel Aviv, Israel

<sup>3</sup>Sagol School of Neuroscience, Tel Aviv University, Tel Aviv, Israel

\*Corresponding authors: MWF - [mfeldman@stanford.edu](mailto:mfeldman@stanford.edu); YR - [yoavram@tauex.tau.ac.il](mailto:yoavram@tauex.tau.ac.il)

December 29, 2022

## Abstract

1  
2 Although cooperative hunting (CH) is widespread among animals, its benefits are unclear.  
3 When rare, CH may allow predators to escape competition and access "big prey" (BP). How-  
4 ever, a lone CH predator cannot such catch food. Cultural transmission may allow CH to  
5 spread fast enough that cooperators can find hunting partners, but competition for BP may  
6 increase. We construct a one-predator, two-prey model in which the predators either learn  
7 to hunt "small prey" (SP) alone, or learn to hunt BP cooperatively. The predators first learn  
8 vertically and then choose partners from which they learn horizontally with probability  $H$ .  
9 CH predators only catch the BP if their partner is cooperative. We find that without horizon-  
10 tal learning, CH cannot evolve when initially rare. Together, a high probability of horizontal  
11 learning and competition for the SP allow CH to evolve. However, CH can only fix in the  
12 predator population if the BP is very abundant. Furthermore, a mutant that increases hori-  
13 zontal learning can invade whenever CH is present but not fixed, because horizontal learning  
14 allows predators to match their strategies, avoiding the situation in which a cooperator can-  
15 not find a partner. While competition for prey is important for determining the degree of  
16 CH that evolves, it is not enough for CH to emerge and spread; horizontal cultural transmis-  
17 sion is essential. Future models may explore factors that control how horizontal transmission  
18 influences cooperative predation, and vice versa. Lessons from our model may be useful in  
19 conservation efforts and wildlife reintroduction programs.

## 1 Introduction

20  
21 Competition for resources is a potent ecological force that could influence the evolution of co-  
22 operative traits (Frank, 2019). However, the effect of competition on the evolution of altruism  
23 depends on the type of altruism in question. Van Dyken and Wade (2012a; 2012b) group the  
24 fitness components that can be donated or shared by the altruist into three categories: resources,  
25 survival, and fecundity. Although previous research has suggested that local competition selects  
26 against altruism (Frank, 2019), the story changes if we differentiate between types of altruism  
27 based on the relevant fitness components; while local competition selects against fecundity altru-  
28 ism, such as cooperative breeding, it selects for resource altruism, such as cooperative hunting  
29 (Van Dyken and Wade, 2012a). In fact, resource altruism may decrease local competition and in

30 the process drive the evolution of survival or fecundity altruism (Van Dyken and Wade, 2012b).

31 Cooperative hunting, also called group hunting, is a type of resource altruism in which mul-  
32 tiple predators hunt prey together and share what they catch. It is performed by a wide variety  
33 of animals such as spiders, lions, wolves, whales, dolphins, chimpanzees, and of course, humans  
34 (Alvard et al., 2002; Boesch, 1994; Mangel et al., 1988; Uetz, 1992; Whitehead and Rendell, 2014).

35 Group-hunting behaviors can be quite complex, and for many species the extent to which  
36 predators must learn them is unclear. For example, type B killer whales (*Orcinus orca*) have  
37 been documented to hunt seals on the Antarctic ice pack by “wave washing”: multiple orcas  
38 simultaneously lunge toward an ice flow and produce a wave that pushes the seal into the water  
39 (Pitman and Durban, 2012). It may be difficult for an individual orca to discover this hunting  
40 behavior because waves generated by one or two orcas rarely succeed at pushing seals into the  
41 water (Pitman and Durban, 2012). However, it is plausible that the wave washing behavior first  
42 emerged when one orca attempted to lunge at a seal on an ice flow while another orca watched  
43 and then joined in. By acting together, they may have created a wave large enough to wash a  
44 seal into the water. Although scientists have not been able to directly observe social learning of  
45 cooperative hunting by killer whales, it might be inferred because (1) mothers and their offspring  
46 exhibit similar behaviors (Rendell and Whitehead, 2001), (2) there are large foraging behavior dif-  
47 ferences between pods, but little variation within pods (Rendell and Whitehead, 2001), (3) there  
48 are several known instances of social learning of foraging skills in Cetaceans (Allen et al., 2013;  
49 Krützen et al., 2005; Mann et al., 2012; Whitehead, 2017), including strong evidence for horizontal  
50 and oblique learning of a foraging behavior in dolphins (Wild et al., 2020) and humpback whales  
51 (Weinrich et al., 1992), and (4) in captivity, killer whales have demonstrated the ability to imitate  
52 actions performed by other killer whales (Abramson et al., 2013). In fact, it has been suggested  
53 that the cultural transmission of complex cooperative foraging behaviors promoted sympatric  
54 speciation between killer whale ecotypes (Foote et al., 2016; Riesch et al., 2012; Whitehead, 2017).

55 Cooperative hunting is not restricted to group-living animals. The Malagassy fossa (*Crypto-*  
56 *procta ferox*) is one of the few known animals that are generally solitary but sometimes hunt in  
57 groups. This mammalian predator lives in Madagascar, and groups of 2 - 3 male fossas have

58 been observed to cooperatively hunt a type of large lemur called Verraux's sifaka (*Propithecus*  
59 *verrauxi*). To catch a sifaka, each fossa takes turns chasing it up a tree until the lemur has been  
60 chased into short trees where it can be caught (Lührs and Dammhahn, 2010). Fossas that hunt in  
61 groups tend to be larger and have more success in mating with females (Lührs et al., 2013). We  
62 can imagine a simple origin for this complex behavior: one fossa was socially attentive enough to  
63 observe another attempting to chase down a lemur, joined in the hunt, and then benefited from  
64 the prey being large enough to share. In fact, a species of giant lemur lived in Madagascar until  
65 recently and would have made sharing especially easy; this extinct lemur may have facilitated  
66 the spread of cooperative hunting in fossas (Lührs and Dammhahn, 2010).

67 Here, we aim to understand what behavioral and ecological characteristics allow cooperative  
68 hunting to emerge. As in the examples of the fossas and even the killer whales, cooperative hunt-  
69 ing may have arisen simply from (1) a motivation to hunt a certain prey together, and (2) social  
70 attentiveness. Thus, cooperative hunting may not require a complicated communication system.  
71 As a proof of concept, it has been shown that seemingly coordinated group hunting behavior  
72 by wolves can be recreated in agent-based simulations with agents following very simple rules:  
73 move towards the prey, keep a safe distance from the prey, and do not run into other wolves  
74 (Muro et al., 2011).

75 The benefit of hunting in groups is not always clear. Previous models suggested that cooper-  
76 ative hunting can only be an evolutionarily stable strategy (ESS) against solitary hunting (Packer  
77 and Ruttan, 1988) if cooperative predators have a much higher payoff (i.e., from a higher rate of  
78 prey encounter, higher hunting success rate, or lower energetic cost) than solitary predators. This  
79 implies that if a predator lives in an environment with strong competition for existing resources,  
80 but with an abundance of a prey type that is costly to capture individually—for instance, because  
81 the prey can jump between trees, as in the sifaka discussed earlier— then the predator population  
82 may benefit from cooperative hunting.

83 Furthermore, a cooperative hunting behavior may spread more easily in a population if it  
84 is transmitted via social learning. A cooperative hunter cannot catch prey if it only interacts  
85 with solitary hunters, but if predators learn from their interaction partners, they can match

86 behaviors so either both cooperate together or both hunt separately. In a model by Cohen et al.  
87 (2021), increased cooperation evolved when individuals learned from their interaction partners.  
88 Moreover, in cultural evolutionary models, behaviors that are detrimental to fitness may still fix  
89 in a population if they are culturally transmitted (i.e. transmitted via social learning) reliably  
90 enough (Cavalli-Sforza and Feldman, 1981). For example, cooperative hunting may at first be  
91 beneficial if a “small prey” (SP) that is hunted solitarily is depleted, while a “big prey” (BP) that  
92 is hunted cooperatively is abundant. However, cultural transmission could spread cooperative  
93 hunting fast enough that it continues to be present in the population even when the BP are  
94 depleted.

95 We investigate how the population dynamics of prey and social transmission of hunting  
96 strategies can influence the evolution of cooperative hunting. In comparison to cooperative  
97 predator defense by prey, few predator-prey models with dynamic population sizes have been  
98 developed for cooperative hunting by predators (but see Alves and Hilker, 2017; Banerjee et al.,  
99 2020; Berec, 2010; Van Dyken and Wade, 2012b). None of these models have examined the in-  
100 teraction between the evolution of the cooperative trait and social learning. Here, we develop a  
101 model in which predators can learn a hunting behavior that targets either the small prey, which  
102 is hunted solitarily, or the big prey, which must be hunted cooperatively. In our model, being  
103 a cooperator can be risky: the benefits are high (the BP has a larger effect on fitness than the  
104 SP, even after being shared), but the predators may not find a cooperative hunting partner to  
105 hunt the big prey. We assume predators first learn vertically, i.e., from their parents, and then  
106 may learn horizontally, i.e., from peers of the same generation, as in Cohen et al. (2021). Our  
107 hypotheses are:

108 (H1) Horizontal social learning selects for cooperative hunting.

109 (H2) Strong competition for small prey selects for cooperative hunting.

110 (H3) Depletion of the big prey limits the evolution of cooperative hunting.

111 (H4) If the previous hypotheses are true, then environmental conditions that select for coopera-  
112 tive hunting (i.e. there is more competition for small prey than big prey and the big prey is

113 more beneficial) will also select for horizontal learning.

## 114 2 Model

115 Consider a population of predators in which each predator can hunt one of two types of prey:  
116 small prey (SP), which can be caught by solitary hunting (SH), and big prey (BP), which can be  
117 caught by cooperative hunting (CH). Both prey types are assumed to have the same carrying ca-  
118 pacity, and their normalized densities are  $r_s$ , and  $r_b$ , respectively (the conversion from population  
119 densities to normalized densities is in Appendix A1).

120 *Predator dynamics.* Assume, for simplicity, that predators that learn to hunt solitarily only hunt  
121 the SP and those that learn to hunt cooperatively only hunt the BP. The frequencies of behaviors  
122 CH and SH in the predator population and  $p$  are  $q = 1 - p$ , respectively. The densities of the big  
123 prey and small prey, normalized to be between 0 and 1, are  $r_b$  and  $r_s$ , respectively. A cooperative  
124 predator successfully catches the BP if another cooperative predator is present.

125 Predators have the following lifecycle: (1) Offspring learn a hunting behavior by vertical  
126 cultural transmission from their parents. (2) Adults learn horizontally (i.e., from members of  
127 their own generation) with probability  $H$ , where  $0 \leq H \leq 1$ . At every learning interaction  
128 between a pair of predators, each of the predators has a 50% chance to be the demonstrator while  
129 the other is the learner. The process of horizontally learning to be cooperative may only require  
130 the learner to be socially attentive to conspecifics hunting, and tolerant enough of conspecifics  
131 to be willing to join in. Likewise, horizontal learning of a solitary behavior may be quite simple;  
132 the cooperative hunter sees that a conspecific is not available to cooperate and is hunting SP, and  
133 from observation recognizes (or learns) that the SP is food.

134 During horizontal learning, cooperative predators that encounter other cooperative preda-  
135 tors continue to be cooperative. The frequency of encounters between cooperative and solitary  
136 predators is  $2p(1 - p)$ , the probability of horizontal learning is  $H$ , and since there is an unbiased  
137 coinflip determining which individual is the demonstrator, the probability that a solitary hunter  
138 learns to be cooperative is  $Hp(1 - p)$ . Hence the frequency  $\tilde{p}$  of CH among adults in the current

139 generation (after vertical and horizontal transmission) is

$$\tilde{p} = p^2 + \underbrace{Hp(1-p)}_{\substack{\text{SH learns CH} \\ \text{successfully}}} + \underbrace{(1-p)p(1-H)}_{\substack{\text{CH encounters SH demonstrator} \\ \text{but does not learn SH}}} = p. \quad (1)$$

140 Therefore, the probability of horizontal learning  $H$  does not affect the actual frequency of coop-  
 141 erative hunting because the frequency at which cooperative individuals learn horizontally to be  
 142 solitary is the same as the frequency of solitary individuals that learn horizontally to be cooper-  
 143 ative.

144 Adults grow and become parents at a rate proportional to the amount of food they ate. If  
 145 two cooperative hunters interact, the fitness of each is  $1 + r_b b_c / 2$ , where  $b_c$  is the energetic benefit  
 146 of the BP, and the factor of  $1/2$  is due to food sharing. If a CH predator interacts with an SH  
 147 predator, it does not catch prey, and its fitness is 1. A solitary hunter always has fitness  $1 + r_s b_s$ ,  
 148 where  $b_s$  is the energetic benefit of the SP. We assume that if BP and SP have the same normalized  
 149 densities, i.e.  $r_s = r_b$ , then the BP gives a higher energetic benefit even after sharing compared  
 150 to the SP alone, i.e.,  $b_c / 2 > b_s$ . We assume that catching BP is more beneficial than SP so that  
 151 cooperating is beneficial when CH is common and BP is abundant. This assumption allows  
 152 the model to focus on which ecological conditions (i.e. prey population dynamics) and cultural  
 153 characteristics (i.e. frequency of CH, probability of horizontal transmission) limit or enable the  
 154 evolution of CH. The payoff matrix for the interactions and a diagram of the model is in Fig. 1.

155 Unlike Cohen et al. (2021), we assume that the predators interact after horizontal transmis-  
 156 sion. Thus, although we have shown that horizontal learning does not change the net frequency  
 157 of cooperative hunting in the population (because learning the solitary and cooperative behav-  
 158 iors is symmetric), it rearranges cooperators and solitary hunters so that the the probability that  
 159 a cooperator can find a partner with which to hunt the big prey increases. The frequencies  $p'$

160 and  $q' = 1 - p'$  of parents in the current generation are given by the following recursions:

$$\begin{aligned} Wp' &= [p^2 + Hp(1-p)] \left(1 + \frac{1}{2}b_cr_b\right) + (1-p)p(1-H) \\ &= p \left[1 + \frac{1}{2}b_cr_b(p + H(1-p))\right] \end{aligned} \quad (2a)$$

$$Wq' = q(1 + b_sr_s), \quad (2b)$$

161 where  $W$  is the mean fitness of the predator population, i.e., the sum of the right sides of Eqs.  
162 (2a) and (2b), namely

$$W = 1 + \frac{1}{2}b_cr_bp[p + H(1-p)] + (1-p)b_sr_s. \quad (3)$$

163 *Prey dynamics.* We also track the prey population dynamics. The population dynamics in terms  
164 of normalized densities  $0 \leq r_s, r_b \leq 1$  are derived in Appendix A1. The recursions are

$$r'_s = \frac{r_s [2 - \beta_s(1-p)]}{1 + r_s} \quad (4a)$$

$$r'_b = \frac{r_b [2 - \beta_b p^2]}{1 + r_b} \quad (4b)$$

165 where  $\beta_s, \beta_b$  are the depletion constants of the SP and BP, respectively. Assume random encoun-  
166 ters between predators and prey, and that the encounter rate with a pair of predators is smaller  
167 than the encounter rate with one predator, i.e.  $\beta_b < \beta_s < 1$ .

### 168 3 Results

169 Note that prey equilibria are  $\hat{r}_s = 0$  or  $\hat{r}_s = 1 - \beta_s(1 - \hat{p})$  and  $\hat{r}_b = 0$  or  $\hat{r}_b = 1 - \beta_b \hat{p}^2$ , where  $\hat{p}$  is  
170 the equilibrium frequency of cooperators in the predator population.

171 **Result 3.1.** *Neither prey can go extinct, i.e.  $\hat{r}_b = 0$  or  $\hat{r}_s = 0$  are not locally stable.*

172 *Proof.* From (4a), if  $r_s$  is very small,  $\frac{r'_s}{r_s} \approx [2 - \beta_s(1-p)](1 - r_s) > 1$  and from (4b), if  $r_b$  is very  
173 small, then also  $r'_b/r_b > 1$ . □



### 174 3.1 Evolution of Cooperative Hunting without Horizontal Learning ( $H = 0$ )

175 Without horizontal transmission,  $H = 0$ , the change in frequency of cooperative hunting is  
 176 derived by setting  $H = 0$  in Eqs. 2. The equilibrium frequency of CH is found by setting  
 177  $p' = p, r'_b = r_b$  and  $r'_s = r_s$  in Eqs. 2. The equilibria  $(\hat{p}, \hat{q}, \hat{r}_b, \hat{r}_s)$  are the following:

- 178 1. Hunting strategies are polymorphic in the population and both prey types are present, i.e.  
 179  $\hat{p}, \hat{q}$  are found by dividing (2a) by (2b),  $\hat{r}_b = 1 - \beta_b \hat{p}^2$ , and  $\hat{r}_s = 1 - \beta_s \hat{q}$ .
- 180 2. SH fixes and both prey are present, i.e.  $(\hat{p}, \hat{q}, \hat{r}_b, \hat{r}_s) = (0, 1, 1, 1 - \beta_s)$ .
- 181 3. CH fixes and both prey are present, i.e.  $(\hat{p}, \hat{q}, \hat{r}_b, \hat{r}_s) = (1, 0, 1 - \beta_b, 1)$
- 182 4. SP or BP go extinct ( $\hat{r}_b = 0$  or  $\hat{r}_s = 0$ : we do not discuss these further because they are not  
 183 locally stable (Result 3.1)

184 Below, we analyze local stability and existence conditions for these equilibria.

185 **Result 3.2.** Suppose both types of prey are present at equilibrium densities  $\hat{r}_b = 1 - \beta_b \hat{p}^2$  and  $\hat{r}_s =$   
 186  $1 - \beta_s(1 - \hat{p})$ . Then there is one polymorphic predator equilibrium  $0 < \hat{p} < 1$  if  $\beta_b < \gamma_1$ , where

$$\gamma_1 = 1 - \frac{2b_s}{b_c}. \quad (5)$$

187 If  $\beta_b \geq \gamma_1$ , there are two polymorphic predator equilibria,  $0 < \hat{p}_1 < \hat{p}_2 < 1$ , if  $\gamma_2 < \beta_b < \gamma_3$ , where

$$\gamma_2 = \frac{1}{3} \left( 1 - \beta_s \frac{2b_s}{b_c} \right) \quad \text{and} \quad \gamma_3 = \frac{4 \left( 1 - \frac{2b_s}{b_c} \beta_s \right)^3}{27 \left( \frac{2b_s}{b_c} \right)^2 (1 - \beta_s)^2}. \quad (6)$$

188 Otherwise there is no polymorphic equilibrium.

189 The proof is in Appendix A2.1.

190 **Result 3.3.** CH cannot increase when rare if  $\hat{r}_s > 0$ , i.e. the equilibrium  $\hat{p} = 0$  is locally stable for  
 191  $\hat{r}_s = 1 - \beta_s$ , and either  $\hat{r}_b = 1$  or  $\hat{r}_b = 0$ .

192 *Proof.* Near  $\hat{p} = 0$ , from (2a),  $p' \approx \frac{p}{W}$  (neglecting higher order terms in  $p$ ), where with  $p$  small,  
193  $W \approx 1 + b_s r_s$ . Thus  $p' < p$  and  $\hat{p} = 0$  is locally stable.  $\square$

194 **Result 3.4.** *If both types of prey are present,  $\hat{r}_s, \hat{r}_b > 0$  and  $\beta_b < \gamma_1$ , then CH can fix if it starts at a high*  
195 *enough frequency, i.e. the equilibrium  $\hat{p} = 1, \hat{r}_b = 1 - \beta_b, \hat{r}_s = 1$  is locally stable.*

196 *Proof.* Near the equilibrium  $\hat{p} = 1, \hat{r}_b = 1 - \beta_b, \hat{r}_s = 1$ , the Jacobian  $J^*$  for its local stability is given  
197 by Equations (A2.6) and (A2.7) in Appendix A2. The three eigenvalues of  $J^*$  are  $\frac{1+b_s}{1+\frac{1}{2}b_c(1-\beta_b)}, \frac{1}{2-\beta_b},$   
198 and  $\frac{1}{2}$ . The first eigenvalue is less than one if  $\beta_b < 1 - \frac{2b_s}{b_c} = \gamma_1$  and the remaining eigenvalues  
199 are always less than one because  $\beta_b < 1$ .  $\square$

200 Trajectories of the cooperative hunting frequency over time with parameter combinations for  
201 which there are no polymorphic equilibria, one polymorphic equilibrium, and two polymorphic  
202 equilibria are shown in Figs 2a - 2c and parameter regions for which different equilibria exist are  
203 shown in Appendix Figures A5.1 and A5.2.

204 If  $\hat{p} = 1$  is stable, there is one polymorphic equilibrium, and we expect it to be unstable. From  
205 Result 3.2, this occurs if  $\beta_b < \gamma_1$  where  $\gamma_1$  can also be written as  $\gamma_1 = \frac{b_c - 2b_s}{b_c}$ . Thus there is one  
206 polymorphic equilibrium, and CH can fix for a wider range of BP depletion values if the BP is  
207 very beneficial and much more beneficial than SP.

208 If there are two polymorphic equilibria (i.e.  $0 < \hat{p} < 1, \hat{r}_b > 0$ , and  $\hat{r}_s > 0$ ) then  $\hat{p} = 1$  is  
209 unstable, and because  $\hat{p} = 0$  is stable (Result 3.3), we expect the larger polymorphic equilibrium  
210 to be stable and the smaller to be unstable. To confirm these predictions and to explore the  
211 stability of the polymorphic equilibrium, we compute the Jacobian  $J^*$  for local stability of the  
212 equilibrium  $\hat{p}, \hat{r}_b, \hat{r}_s$ , shown in (A2.6) - (A2.7). We created a parameter grid and evaluated the  
213 eigenvalues of the Jacobian for each parameter combination. As predicted, when there is one  
214 polymorphic equilibrium, it is unstable, and when there are two, the larger is stable. Thus the  
215 smaller polymorphic equilibrium determines the range of initial frequencies of CH  $p^{(0)}$  for which  
216 CH will persist in the population (Fig. 3). The range of frequencies  $p$  of CH for which CH will  
217 persist is larger if ecological conditions favor CH: consuming BP is much more beneficial than  
218 small prey, i.e.  $2b_s/b_c$  is small, and depletion of SP  $\beta_s$  is high. However, low depletion of BP  $\beta_b$

219 only slightly increases this range.(Fig 3).

### 220 3.2 Evolution of Cooperative Hunting with Horizontal Social Learning

$$221 \quad (H > 0)$$

222 There can be zero, one, or two polymorphic equilibria ( $0 < \hat{p} < 1$ ), depending on the parameter  
 223 values (Figs. 2d - 2f, A5.4, A5.5, A5.6). The conditions for existence of each of these equilibrium  
 224 configurations are derived in Appendix (A3.1). The conditions for the existence of one and only  
 225 one polymorphic equilibrium are: (a) horizontal learning  $H$  is high, the rate of depletion of BP  
 226  $\beta_b$  is low, availability  $1 - \beta_s$  of SP is low, and the benefit of SP relative to BP  $2b_s/b_c$  is low, or (b) if  
 227 the opposite conditions are true (i.e.  $H$  is low and  $\beta_b$ ,  $1 - \beta_s$ , and  $2b_s/b_c$  are high). The conditions  
 228 for the existence of either two or no polymorphic equilibria are more difficult to interpret.

229 Analysing the stability of the equilibria, we have the following results on the evolution of CH.

230 **Result 3.5.** *CH increases when rare, i.e.  $\hat{p} = 0$  is unstable, if (a) the BP is present, i.e.  $\hat{r}_b > 0$ , but the SP*  
 231 *is extinct, i.e.  $\hat{r}_s = 0$ , or if (b) the prey species are at the equilibrium  $\hat{r}_b = 1$  and  $\hat{r}_s = 1 - \beta_s$ , and*

$$232 \quad \underbrace{\frac{1}{2}Hb_c}_{\text{Expected benefit of cooperative hunting when } p=0} > \underbrace{b_s(1 - \beta_s)}_{\text{Expected benefit of solitary hunting when } p=0} \quad (7)$$

232 *Proof.* If  $p$  is close to 0, then from (2a),  $\frac{p'}{p} \approx \frac{1}{\hat{W}} \left(1 + \frac{1}{2}b_c\hat{r}_bH\right)$ , where from (3)  $\hat{W} = 1 + b_s\hat{r}_s$  at  $\hat{p} = 0$ .  
 233 Then  $p'/p > 1$  if  $\frac{1}{2}\hat{r}_bHb_c > b_s\hat{r}_s$ . Thus, if  $\hat{r}_s = 0$  but  $\hat{r}_b > 0$ , then CH increases when rare. If  $\hat{r}_s > 0$ ,  
 234 then since  $p \approx 0$  we have  $\hat{r}_s \approx 1 - \beta_s$  and  $\hat{r}_b = 1$ . Then CH increases if  $\frac{1}{2}Hb_c > b_s(1 - \beta_s)$ .  $\square$

235 The left side of (7) is the expected benefit of being a rare cooperative hunter because it is  
 236 the benefit of big prey after sharing,  $\frac{1}{2}b_c$ , scaled by the probability of interacting with another  
 237 cooperative hunter due to horizontal transmission,  $H$ . The right side is the expected benefit of SH  
 238 when CH is rare because it is the benefit of small prey  $b_s$  scaled by the probability of obtaining  
 239 small prey,  $1 - \beta_b$ . When CH is rare, the depletion of the BP due to CH is negligible, so that  
 240 depletion of BP  $\beta_b$  does not affect the expected benefit of cooperative hunting.

241 Result 3.5 means that high enough probabilities of horizontal learning allow CH to evolve,  
 242 even if hunting the SP is very beneficial ( $2b_s/b_c$  close to 1) and the SP has a low depletion rate  
 243 ( $\beta_s$  low).

244 **Result 3.6.** CH fixes (i.e.  $\hat{p} = 1$  is locally stable) if the BP is present, i.e.  $\hat{r}_b > 0$ , and either (a) the SP is  
 245 extinct, i.e.  $\hat{r}_s = 0$ , or (b)  $\hat{r}_s = 1$ ,  $\hat{r}_b = 1 - \beta_b$  and

$$\underbrace{\frac{1}{2}b_c(1 - \beta_b)}_{\text{Expected benefit of cooperative hunting if } p = 1} > \underbrace{b_s}_{\text{Expected benefit of solitary hunting if } p = 1} \quad (8)$$

246 *Proof.* If  $p$  is very close to 1; i.e.  $q$  is very close to 0, then from (2b),  $\frac{q'}{q} \approx \frac{1}{\hat{W}}(1 + b_s\hat{r}_s)$  where  
 247 from (3),  $\hat{W} = 1 + \frac{1}{2}b_c\hat{r}_b$ . Then  $q'/q < 1$  (and fixation of cooperative hunting is locally stable) if  
 248  $b_s\hat{r}_s < \frac{1}{2}b_c\hat{r}_b$ . If the SP are extinct, i.e.  $r_s = 0$ , this inequality is trivially true. If SP are present, i.e.  
 249  $\hat{r}_s > 0$ , then  $\hat{r}_s = 1$ . Also,  $\hat{r}_b = 1 - \beta_b$ , so  $q'/q < 1$  if  $\frac{1}{2}b_c(1 - \beta_b) > b_s$ .  $\square$

250 Result 3.6 means that cooperative hunting cannot be invaded by solitary hunting if the BP  
 251 has a low depletion rate ( $\beta_b$  low) and hunting the SP is much less beneficial than hunting the BP  
 252 ( $2b_s/b_c$  is small). Result 3.6 can also be interpreted as stating that solitary hunting invades if its  
 253 fitness benefit is greater than the benefit of cooperative hunting when almost all predators are  
 254 cooperators. Here, because solitary hunting is rare, the depletion constant of the SP,  $\beta_s$ , does not  
 255 affect the benefit of solitary hunting.

256 Note that inequality (8) is equivalent to  $\beta_b < \gamma_1$ , the condition for CH to fix and one poly-  
 257 morphic equilibrium to exist if  $H = 0$  (Result 3.2). CH fixes under the same conditions for  $H = 0$   
 258 and  $H > 0$  because horizontal transmission  $H$  does not enter in inequality (8).

### 259 3.2.1 Local Stability, $H > 0$

260 For the local stability of a polymorphic equilibrium, we analyze the eigenvalues of the Jacobian  
 261  $J^*$  near the equilibrium  $\hat{p}, \hat{r}_b, \hat{r}_s$ , shown in (A3.4).

262 If there is no cycling, i.e. the eigenvalues are real, then we can use results 3.5 and 3.6, along  
 263 with the conditions for zero, one or two polymorphic equilibria to exist (Appendix A3.1) to

264 predict the local stability of polymorphic equilibria and suggest the following stability configu-  
265 rations:

- 266 1. There are no polymorphic equilibria and solitary hunting ( $\hat{p} = 0$ ) is the only stable equilib-  
267 rium.
- 268 2. There are no polymorphic equilibria and cooperative hunting ( $\hat{p} = 1$ ) is the only stable  
269 equilibrium.
- 270 3. Neither solitary nor cooperative hunting fix ( $\hat{p} = 0$  and  $\hat{p} = 1$  are not locally stable). There  
271 is one polymorphic equilibrium, which is stable.
- 272 4. Both solitary hunting and cooperative hunting can fix. There is one polymorphic equilib-  
273 rium, which is unstable.
- 274 5. Solitary hunting can fix but cooperative hunting cannot. There are two polymorphic equi-  
275 libria, the larger of which is stable.

276 Note that if SH cannot fix (CH invades) but CH can fix, there cannot be any polymorphic equi-  
277 libria (see Appendix A3.1 for justification). Numerical calculations of the eigenvalues of  $J^*$  for  
278 1000 randomly chosen parameter combinations confirmed that all equilibria fit with the five pos-  
279 sibilities suggested above. The numerical calculations also confirmed results 3.5 and 3.6, i.e. that  
280 (a) CH increases when rare if the benefit of hunting the BP when CH is rare is greater than the  
281 benefit of hunting the SP when SH is common, and (b) that CH fixes if its benefit when common  
282 is greater than the benefit of SH when SH is rare.

### 283 3.2.2 *Convergent Stable Strategy of Cooperative Hunting*

284 The convergent stable strategy, or CSS, of cooperative hunting is the smallest locally stable equi-  
285 librium frequency of CH. It is the stable strategy that can be reached from the cumulative evo-  
286 lution of small changes in the degree of cooperative hunting, as defined in Wakano and Aoki  
287 (2006). For example, if both  $\hat{p} = 0$  and  $\hat{p} = 1$  are locally stable, then the CSS is  $\hat{p} = 0$ . The  
288 probability of horizontal transmission  $H$ , the benefit ratio of SH to CH,  $2b_s/b_c$ , and depletion of

289 the SP,  $\beta_s$ , all have large effects on the CSS, but the depletion rate of the BP,  $\beta_b$ , only affects the  
 290 CSS if the horizontal learning probability  $H$ , the benefit ratio  $2b_s/b_c$ , and the depletion rate of SP  
 291  $\beta_s$  are large enough (Figs 4, A5.3).

292 At the CSS of the system, improving conditions for cooperative hunting, i.e. increasing hori-  
 293 zontal learning  $H$ , decreasing the benefit ratio  $2b_s/b_c$ , and lowering the depletion of big prey,  $\beta_b$ ,  
 294 also increase population mean fitness,  $W$  (Fig A5.7). Comparing Fig. A5.7 to Fig. 4, population  
 295 mean fitness of predators increases with the CSS frequency of cooperative hunting.

### 296 3.3 Evolution of Horizontal Social Learning, $H$

297 For the evolution of horizontal learning, we introduce a modifier locus that controls the prob-  
 298 ability of horizontal learning as in (Cohen et al., 2021; Feldman, 1972; Ram et al., 2018). This  
 299 horizontal learning locus has alleles  $\sigma_1$  and  $\sigma_2$ , which have probabilities of horizontal transmis-  
 300 sion  $H$  and  $H + \delta_H$ , respectively, with  $\delta_H$  small and either positive or negative.

301 The two hunting behavior types are  $\phi = CH, SH$ , cooperative and solitary hunting, respec-  
 302 tively. The frequencies of  $\sigma_1$  and  $\sigma_2$  are  $u$  and  $x$ , respectively, and  $\sigma_1$  and  $\sigma_2$  are vertically transmit-  
 303 ted independently of CH and SH. Let the frequencies of the four phenogenotypes in the offspring  
 304  $CH\sigma_1$ ,  $SH\sigma_1$ ,  $CH\sigma_2$ , and  $SH\sigma_2$  be  $u_c, u_s, x_c, x_s$ , respectively, where  $p = u_c + x_c$  is the frequency of  
 305 CH predators.

306 Adults interact and learn, with probabilities of adopting either CH or SH, for each interaction  
 307 type shown in Table 2. The frequency of adults of type  $CH\sigma_1$ ,  $SH\sigma_1$ ,  $CH\sigma_2$ , and  $SH\sigma_2$  after  
 308 horizontal transmission are

$$\tilde{u}_c = u_c p + u_c q(1 - H) + H u_s p \quad (9a)$$

$$= u_c + H(u_s p - u_c q)$$

$$\tilde{u}_s = u_s - H(u_s p - u_c q) \quad (9b)$$

$$\tilde{x}_c = x_c + (H + \delta_H)(x_s p - x_c q) \quad (9c)$$

$$\tilde{x}_s = x_s - (H + \delta_H)(x_s p - x_c q), \quad (9d)$$

309 respectively. Interestingly, the quantity  $\Delta = (u_s p - u_c q)$  resembles a two-phenotype disequi-  
 310 librium and could be regarded as a measure of covariance between the cooperative/solitary  
 311 trait and the extent of learning (Ihara and Feldman, 2004). Note that  $x = x_c + x_s = \tilde{x}_c + \tilde{x}_s$ ,  
 312  $u = u_c + u_s = \tilde{u}_c + \tilde{u}_s$ , but

$$\tilde{p} = \tilde{u}_c + \tilde{x}_c = p + \delta_H(x_s p - x_c q) = p + \delta_H \Delta. \quad (10)$$

313 If  $x$  is very small ( $x_s$  and  $x_c$  are also very small), then increasing horizontal learning increases the  
 314 frequency of cooperative hunting if  $u_s > u_c$ , i.e. there are more solitary hunters than cooperators.

The fitness values of adults following these interactions are shown in Table 3. Then the frequency with which  $CH\sigma_1$  adults become parents is  $u'_c$ , where

$$Wu'_c = u_c \left[ p \left( 1 + \frac{1}{2} b_c r_b \right) + q(1 - H) \right] + u_s p H \left( 1 + \frac{1}{2} b_c r_b \right),$$

which simplifies to

$$Wu'_c = \tilde{u}_c + \frac{1}{2} b_c r_b p [u_c + H u_s].$$

315 Thus the frequencies of  $CH\sigma_1$ ,  $SH\sigma_1$ ,  $CH\sigma_2$ , and  $SH\sigma_2$  adults that become parents are given  
 316 by the following recursions:

$$Wu'_c = \tilde{u}_c + \frac{1}{2} b_c r_b p [u_c + H u_s], \quad (11a)$$

$$Wu'_s = \tilde{u}_s (1 + b_s r_s), \quad (11b)$$

$$Wx'_c = \tilde{x}_c + \frac{1}{2} b_c r_b p [x_c + x_s (H + \delta_H)], \quad (11c)$$

$$Wx'_s = \tilde{x}_s (1 + b_s r_s). \quad (11d)$$

317 The population mean fitness is the sum of the right sides of (11), i.e.

$$\begin{aligned} W &= 1 + \frac{1}{2} b_c r_b p [p + Hq + \delta_H x_s] + \tilde{q} b_s r_s \\ &= 1 + \frac{1}{2} b_c r_b p (p + Hq) + b_s r_s q + \delta_H \left[ \frac{1}{2} b_c r_b p x_s + b_s r_s (x_c q - x_s p) \right] \end{aligned} \quad (12)$$

318 Assume the population is fixed on  $\sigma_1$ . We assume the mutant  $\sigma_2$  appears near a locally stable  
319 polymorphic equilibrium  $\hat{p}, \hat{r}_b, \hat{r}_c$  with  $0 < \hat{p} < 1$  that solves (A3.2) (see Result 3.4 and Appendix  
320 A3.1 for parameter values that allow this equilibrium to exist), with  $\hat{r}_b, \hat{r}_c > 0$ . We disregard  
321 evolution of  $H$  near fixed solitary or cooperative hunting equilibria,  $\hat{p} = 0$  or  $\hat{p} = 1$  respectively,  
322 because if a hunting behavior is fixed in the population, horizontal learning cannot alter the  
323 learner's behavior and thus will not affect evolution. Note that  $\hat{u}_c = \hat{p}, \hat{u}_s = \hat{q} = 1 - \hat{p}$ .

324 **Result 3.7.** *Phenotype  $\sigma_2$ , with increased horizontal learning probability  $H + \delta_H$ , i.e.  $\delta_H > 0$ , invades*  
325 *a population at the polymorphic equilibrium  $\hat{p}$ , which is fixed on  $\sigma_1$  with learning probability  $H$  and*  
326  *$\hat{r}_b = 1 - \beta_b \hat{p}^2, \hat{r}_s = 1 - \beta_s \hat{q}$ .*

327 *Proof.* The Jacobian  $J_x$  for linear increase of  $x_c$  and  $x_s$ , whose eigenvalues determine whether  $\sigma_2$   
328 invades, is shown in Appendix Eq. A4.2 and its eigenvalues are in Eq. A4.6. In Appendix A4,  
329 we show that the leading eigenvalue of this Jacobian is always greater than one.  $\square$

330 Thus increased horizontal learning always invades a population in which both cooperative  
331 and solitary hunters are present, regardless of prey reward and depletion. It is important to note  
332 that when increased horizontal learning evolves, it also drives the evolution of increased CH  
333 (Fig 4) and can even lead to the polymorphic equilibria disappearing, causing CH to fix in the  
334 population (Figs A5.4, A5.5, A5.6). However, CH must be present in the system for  $H$  to evolve  
335 (because horizontal transmission does not affect cultural evolution if the population is fixed on  
336 SH, i.e., solitary hunting), but without horizontal transmission, CH must initially be present to  
337 reach a stable polymorphism.

## 338 4 Discussion

339 Horizontal learning allows cooperative hunting to evolve. Even if the benefit of small prey (i.e.  
340  $b_s$ ) is small and competition for it is fierce and the big prey is plentiful and nutritious, CH cannot  
341 increase when initially rare without horizontal transmission (Result 3.2). This conclusion sup-  
342 ports hypothesis (H1) but not hypotheses (H2) and (H3). Rare cooperative hunters cannot find  
343 a partner with which to hunt the big prey, and thus will not succeed unless solitary hunters can



344 learn to cooperate. Similarly, in Cohen et al. (2021), high rates of horizontal transmission allowed  
345 a cooperative trait (in a Prisoner's Dilemma game) to evolve. Horizontal learning helps a coop-  
346 erator find a hunting partner (in our model) or increase the inclusive fitness of the cooperative  
347 phenotype (in Cohen et al. (2021)).

348 The result that cooperative hunting requires horizontal learning to evolve seems to contradict  
349 a game theory model (Packer and Ruttan, 1988), which concluded that cooperative hunting can  
350 evolve if the big prey is much more rewarding (e.g. more nutritious or very large and fatty) than  
351 the small prey. However, Packer and Ruttan (1988) analyzed the evolutionary stable strategies,  
352 the ESS, but did not discuss which ESS was actually attainable, i.e. whether cooperative hunting  
353 could increase when rare to the ESS frequency. Our model emphasizes the importance of identi-  
354 fying which evolutionary strategies are attainable and shows that an apparently optimal strategy  
355 may not actually emerge. Furthermore, we incorporate population dynamics of the prey, since  
356 depletion of prey can affect which hunting strategies have higher fitness.

357 Hypotheses (H2) and (H3) predict that strong competition for SP and weak competition for  
358 big prey should favor cooperative hunting. These hypotheses are supported if cooperative hunt-  
359 ing is already present in the population, i.e.  $p$  is not very small, or if predators learn horizontally,  
360  $H > 0$ . In these cases, if big prey are abundant and rewarding ( $\beta_b$  is low and  $b_c$  is high) com-  
361 pared to small prey ( $\beta_s$  is high and  $b_s$  is low), then cooperative hunting can spread through the  
362 population and fix, resulting in all predators becoming cooperators. However, from analysis of  
363 the CSS of the system, the relative importance of each of these cultural and environmental factors  
364 in decreasing order would be: probability of horizontal transmission  $>$  benefit ratio of the prey  
365 types,  $2b_s/b_c$  and depletion rate of small prey,  $\beta_s >$  depletion rate of big prey,  $\beta_b$ . The impact  
366 of prey abundance on predator cooperation may be seen in wolves: while the grey wolves of  
367 North America hunt in large packs, Arabian wolves in the Middle East have been observed to  
368 hunt in groups of only 2 - 4 individuals. The much smaller pack size has been attributed to  
369 the extinction of large prey in the Middle East and abundance of human trash (which does not  
370 require cooperation) that wolves can scavenge (Hefner and Geffen, 1999).

371 Our results predict that a species that can hunt both solitarily and cooperatively should be

372 able to learn not only from parents, but also from peers within the same generation. Such social  
373 learning may not require the ability to copy, but may occur through social facilitation (Giraldeau  
374 and Caraco, 2018) if predators are socially attentive enough to notice a conspecific hunting, are  
375 willing to join a hunt, and can share the catch. Further research on animals such as the fossas  
376 discussed earlier (Lührs and Dammhahn, 2010) may clarify the directionality of cultural trans-  
377 mission, i.e. whether it occurs horizontally, vertically, or obliquely from non-parental adults.

378 Introducing a mutant with an increased tendency to learn horizontally produced two surpris-  
379 ing results. First, the horizontal learning and hunting strategy traits are not independent during  
380 the stage where juveniles interact and can learn hunting behaviors from each other. Horizontal  
381 learning acts to control the force of phenotypic disequilibrium, analogous to the rate of recomb-  
382 nation in population genetics models (Ihara and Feldman, 2004). However, unlike the prediction  
383 of hypothesis (H4), at the polymorphic equilibrium, increased horizontal learning evolves irre-  
384 spective of any of the other model parameters. Horizontal learning allows a predator to match  
385 its behavior to that of its interaction partner, which benefits the cooperator and does not harm  
386 a solitary hunter. This result may change if horizontal learning of the solitary behavior were to  
387 result in solitary hunters directly interfering with each other, e.g. if the learner tried to steal the  
388 prey that an unwitting demonstrator was hunting.

389 Here, horizontal learning can only evolve from stable polymorphism (i.e. both cooperative  
390 and solitary hunting are present in the population), but the population may be fixed at one of  
391 these hunting behaviors. The evolution of horizontal learning may be significant, even if all in-  
392 dividuals use the same hunting strategy, if predators not only learn foraging strategies, but also  
393 prey locations, horizontally. For example, ravens likely share information about the location of  
394 food at communal roosts (Wright et al., 2003) and honeybees use the waggle dance to recruit  
395 each other to particular food sites (I'Anson Price and Grüter, 2015). In our model, a predator  
396 that learns horizontally to hunt solitarily is assumed to watch a current solitary hunter and then  
397 proceed to hunt a small prey by itself. However, if horizontal learning were to communicate  
398 the location of food, then a producer-scrounger game might emerge between solitary hunters.  
399 In a producer-scrounger game, some predators, the producers, individually discover food while

400 others, the scroungers, watch the producers and steal some of the food the producers find (Gi-  
401 raldeau and Caraco, 2018). Cooperative hunting may be able to evolve even if the benefit of  
402 sharing the big prey is less than the benefit of solitarily catching the small prey, i.e.  $\frac{1}{2}b_c < b_s$ , if  
403 solitary hunters that learn from each other were to compete directly for found food.

404 Predictions from our research may be valuable for conservation and wildlife reintroduction  
405 programs. For example, a program to reintroduce the Asiatic wild ass (*Equus hemionus*) in Israel  
406 began in 1983 (Saltz and Rubenstein, 1995), and in recent years this population has become  
407 established. Our model suggests that the new availability of a large ungulate, for example this  
408 ass, may enable Arabian wolves to hunt more cooperatively, which could translate to larger pack  
409 sizes.

410 Our model analyzes predator behavior frequencies, but not predator population density. To  
411 further understand the ecological interactions underpinning the evolution of cooperative hunt-  
412 ing, future studies should incorporate the population dynamics of the predator. Although coop-  
413 erative hunting and horizontal learning can result in a high frequency of predators performing  
414 the same behavior, in our model neither of the prey types went extinct; the  $\hat{r}_s = 0$  and  $\hat{r}_b = 0$   
415 equilibria were each unstable. This may not be the case if predator population densities change.  
416 If the increase in fitness from cooperative hunting causes a dramatic increase in predator popu-  
417 lation density, then the more valuable big prey may go extinct. These analyses can guide wildlife  
418 reintroduction programs including that of the aforementioned Asiatic wild ass.

419 Social and cooperative predators such as killer whales, wolves, some species of sea otters  
420 (Eisenberg, 2013; Estes et al., 1998), and humans play an essential role in structuring ecosystems  
421 across the globe. This study advances a nascent field (e.g. see (Berec, 2010; Borofsky and Feld-  
422 man, 2022) that studies the influence of social learning and cooperation by predators on ecosys-  
423 tems, and emphasizes that there is a feedback loop between prey availability and the degree of  
424 cooperation among predators.

425

## 5 Acknowledgements

426 We thank Eli Geffen, Amiyaal Ilany, Ofek Kraus, Arnon Lotem, Ran Barkai, and Tal Simon for  
427 discussions and comments. This work was supported in part by the Council for Higher Education  
428 of Israel's PhD Sandwich Scholarship Program (TMB), Morrison Institute for Population and  
429 Resource Studies at Stanford University (MWF), John Templeton Foundation (MWF and YR),  
430 Israel Science Foundation (YR 552/19), and the Minverva Shiftung Center for Lab Evolution  
431 (YR).

## Literature Cited

432

433 Abramson, J. Z., V. Hernández-Lloreda, J. Call, and F. Colmenares, 2013. Experimental evidence  
434 for action imitation in killer whales (*Orcinus orca*). *Animal Cognition* **16**:11–22.

435 Allen, J., M. Weinrich, W. Hoppitt, and L. Rendell, 2013. Network-based diffusion analysis reveals  
436 cultural transmission of lobtail feeding in humpback whales. *Science* **340**:485–488.

437 Alvard, M. S., D. A. Nolin, P. Brosius, L. A. Kuznar, J. Rousseau, L. M. Ruttan, E. A. Smith,  
438 R. Sosis, M. S. Alvard, and D. A. Nolin, 2002. Rousseau’s whale hunt? coordination among  
439 big-game hunters. *Current anthropology* **43**:533–559.

440 Alves, M. T. and F. M. Hilker, 2017. Hunting cooperation and allee effects in predators. *Journal of*  
441 *Theoretical Biology* **419**:13–22.

442 Banerjee, S., A. Sha, and J. Chattopadhyay, 2020. Cooperative predation on mutualistic prey  
443 communities. *Journal of Theoretical Biology* **490**:110156.

444 Berec, L., 2010. Impacts of foraging facilitation among predators on predator-prey dynamics.  
445 *Bulletin of Mathematical Biology* **72**:94–121.

446 Boesch, C., 1994. Cooperative hunting in wild chimpanzees. *Animal Behaviour* **48**:653–667.

447 Borofsky, T. M. and M. W. Feldman, 2022. Static environments with limited resources select for  
448 multiple foraging strategies rather than conformity. *Ecological Monographs* **92**.

449 Cavalli-Sforza, L. L. and M. W. Feldman, 1981. Cultural transmission and evolution: a quantita-  
450 tive approach. Princeton University Press.

451 Cohen, D., O. Lewin-Epstein, M. W. Feldman, and Y. Ram, 2021. Non-vertical cultural trans-  
452 mission, assortment and the evolution of cooperation. *Proceedings of the Royal Society B*  
453 **288**:20203162.

454 Eisenberg, C., 2013. The wolf’s tooth: keystone predators, trophic cascades, and biodiversity.  
455 Island Press.

- 456 Estes, J. A., M. T. Tinker, T. M. Williams, and D. F. Doak, 1998. Killer whale predation on sea  
457 otters linking oceanic and nearshore ecosystems. *science* **282**:473–476.
- 458 Feldman, M. W., 1972. Selection for linkage modification: I. random mating populations. *Theo-*  
459 *retical population biology* **3**:324–346.
- 460 Foote, A. D., N. Vijay, M. C. Ávila-Arcos, R. W. Baird, J. W. Durban, M. Fumagalli, R. A. Gibbs,  
461 M. B. Hanson, T. S. Korneliussen, M. D. Martin, et al., 2016. Genome-culture coevolution  
462 promotes rapid divergence of killer whale ecotypes. *Nature communications* **7**:1–12.
- 463 Frank, S. A., 2019. Foundations of social evolution. In *Foundations of Social Evolution*. Princeton  
464 University Press.
- 465 Giraldeau, L.-A. and T. Caraco, 2018. Social Foraging Theory. Princeton University Press.
- 466 Hefner, R. and E. Geffen, 1999. Group size and home range of the arabian wolf (*canis lupus*) in  
467 southern israel. *Journal of Mammalogy* **80**:611–619.
- 468 I'Anson Price, R. and C. Grüter, 2015. Why, when and where did honey bee dance communication  
469 evolve? *Frontiers in Ecology and Evolution* **3**:125.
- 470 Ihara, Y. and M. W. Feldman, 2004. Cultural niche construction and the evolution of small family  
471 size. *Theoretical population biology* **65**:105–111.
- 472 Krützen, M., J. Mann, M. R. Heithaus, R. C. Connor, L. Bejder, and W. B. Sherwin, 2005. Cultural  
473 transmission of tool use in bottlenose dolphins. *Proceedings of the National Academy of Sciences*  
474 **102**:8939–8943.
- 475 Lührs, M.-L. and M. Dammhahn, 2010. An unusual case of cooperative hunting in a solitary  
476 carnivore. *Journal of Ethology* **28**:379–383.
- 477 Lührs, M.-L., M. Dammhahn, and P. Kappeler, 2013. Strength in numbers: males in a carnivore  
478 grow bigger when they associate and hunt cooperatively. *Behavioral Ecology* **24**:21–28.
- 479 Mangel, M., C. W. Clark, et al., 1988. Dynamic Modeling in Behavioral Ecology, volume 63.  
480 Princeton University Press.

- 481 Mann, J., M. A. Stanton, E. M. Patterson, E. J. Bienenstock, and L. O. Singh, 2012. Social networks  
482 reveal cultural behaviour in tool-using dolphins. *Nature Communications* **3**:1–8.
- 483 Muro, C., R. Escobedo, L. Spector, and R. Coppinger, 2011. Wolf-pack (*Canis lupus*) hunting  
484 strategies emerge from simple rules in computational simulations. *Behavioural Processes* **88**:192–  
485 197.
- 486 Packer, C. and L. Rutan, 1988. The Evolution of Cooperative Hunting. *The American Naturalist*  
487 **132**:159–198.
- 488 Pitman, R. L. and J. W. Durban, 2012. Cooperative hunting behavior, prey selectivity and prey  
489 handling by pack ice killer whales (*Orcinus orca*), type b, in antarctic peninsula waters. *Marine*  
490 *Mammal Science* **28**:16–36.
- 491 Ram, Y., U. Liberman, and M. W. Feldman, 2018. Evolution of vertical and oblique transmission  
492 under fluctuating selection. *Proceedings of the National Academy of Sciences* **115**:E1174–E1183.
- 493 Rendell, L. and H. Whitehead, 2001. Culture in whales and dolphins. *Behavioral and Brain Sciences*  
494 **24**:309–324.
- 495 Riesch, R., L. G. Barrett-Lennard, G. M. Ellis, J. K. Ford, and V. B. Deecke, 2012. Cultural traditions  
496 and the evolution of reproductive isolation: ecological speciation in killer whales? *Biological*  
497 *Journal of the Linnean Society* **106**:1–17.
- 498 Saltz, D. and D. I. Rubenstein, 1995. Population dynamics of a reintroduced asiatic wild ass  
499 (*Equus hemionus*) herd. *Ecological Applications* **5**:327–335.
- 500 Uetz, G. W., 1992. Foraging strategies of spiders. *Trends in Ecology & Evolution* **7**:155–159.
- 501 Van Dyken, J. D. and M. J. Wade, 2012a. Origins of altruism diversity i: the diverse ecological  
502 roles of altruistic strategies and their evolutionary responses to local competition. *Evolution:*  
503 *International Journal of Organic Evolution* **66**:2484–2497.
- 504 Van Dyken, J. D. and M. J. Wade, 2012b. Origins of altruism diversity ii: Runaway coevolution

505 of altruistic strategies via “reciprocal niche construction”. *Evolution: International Journal of*  
506 *Organic Evolution* **66**:2498–2513.

507 Wakano, J. Y. and K. Aoki, 2006. A mixed strategy model for the emergence and intensification  
508 of social learning in a periodically changing natural environment. *Theoretical population biology*  
509 **70**:486–497.

510 Weinrich, M. T., M. R. Schilling, and C. R. Belt, 1992. Evidence for acquisition of a novel feeding  
511 behaviour: lobtail feeding in humpback whales, megaptera novaeangliae. *Animal behaviour*  
512 **44**:1059–1072.

513 Whitehead, H., 2017. Gene–culture coevolution in whales and dolphins. *Proceedings of the National*  
514 *Academy of Sciences* **114**:7814–7821.

515 Whitehead, H. and L. Rendell, 2014. *The Cultural Lives of Whales and Dolphins*. University of  
516 Chicago Press.

517 Wild, S., W. J. Hoppitt, S. J. Allen, and M. Krützen, 2020. Integrating genetic, environmental,  
518 and social networks to reveal transmission pathways of a dolphin foraging innovation. *Current*  
519 *Biology* **30**:3024–3030.

520 Wright, J., R. E. Stone, and N. Brown, 2003. Communal roosts as structured information centres  
521 in the raven, *corvus corax*. *Journal of Animal Ecology* pages 1003–1014.

## 522 **6 Tables**



Table 1: Names and descriptions of the variables and parameters in the model

| Name      | Definition                                                              |
|-----------|-------------------------------------------------------------------------|
| $p$       | frequency of cooperative hunting                                        |
| $q$       | $1 - p$ , the frequency of solitary hunting                             |
| $r_b$     | normalized density of the big prey                                      |
| $r_s$     | normalized density of the small prey                                    |
| $b_c$     | fitness benefit to the cooperative pair for hunting the big prey        |
| $b_s$     | fitness benefit to an individual for hunting the small prey             |
| $\beta_b$ | depletion constant by cooperative hunting of big prey                   |
| $\beta_s$ | depletion constant by solitary hunting of small prey                    |
| $H$       | the probability of horizontal learning from a potential hunting partner |

Table 2: Interactions between the four phenotypes if the horizontal learning mutant is present.

| Learner Type | Behavior of teacher | Frequency of encounter | Probability learner adopts hunting behavior |                    |
|--------------|---------------------|------------------------|---------------------------------------------|--------------------|
|              |                     |                        | CH                                          | SH                 |
| $CH\sigma_1$ | CH                  | $u_cp$                 | 1                                           | 0                  |
|              | SH                  | $u_cq$                 | $1 - H$                                     | $H$                |
| $SH\sigma_1$ | CH                  | $u_sp$                 | $H$                                         | $1 - H$            |
|              | SH                  | $u_sq$                 | 0                                           | 1                  |
| $CH\sigma_2$ | CH                  | $x_cp$                 | 1                                           | 0                  |
|              | SH                  | $x_cq$                 | $1 - H - \delta_H$                          | $H + \delta_H$     |
| $SH\sigma_2$ | CH                  | $x_sp$                 | $H + \delta_H$                              | $1 - H - \delta_H$ |
|              | SH                  | $x_sq$                 | 0                                           | 1                  |

Table 3: Fitnesses of adults following hunting interactions.

| Learner Type | Behavior of teacher | Frequency of encounter | Expected fitness of behavior            |                                  |
|--------------|---------------------|------------------------|-----------------------------------------|----------------------------------|
|              |                     |                        | CH                                      | SH                               |
| $CH\sigma_1$ | CH                  | $u_cp$                 | $1 + \frac{1}{2}b_cr_b$                 | 0                                |
|              | SH                  | $u_cq$                 | $1 - H$                                 | $H(1 + b_sr_s)$                  |
| $S\sigma_1$  | CH                  | $u_sp$                 | $H(1 + \frac{1}{2}b_cr_b)$              | $(1 - H)(1 + b_sr_s)$            |
|              | SH                  | $u_sq$                 | 0                                       | $1 + b_sr_s$                     |
| $CH\sigma_2$ | CH                  | $x_cp$                 | $1 + \frac{1}{2}b_cr_b$                 | 0                                |
|              | SH                  | $x_cq$                 | $1 - H - \delta_H$                      | $(H + \delta_H)(1 + b_sr_s)$     |
| $SH\sigma_2$ | CH                  | $x_sp$                 | $(H + \delta_H)(1 + \frac{1}{2}b_cr_b)$ | $(1 - H - \delta_H)(1 + b_sr_s)$ |
|              | SH                  | $x_sq$                 | 0                                       | $1 + b_sr_s$                     |

## 7 Figures

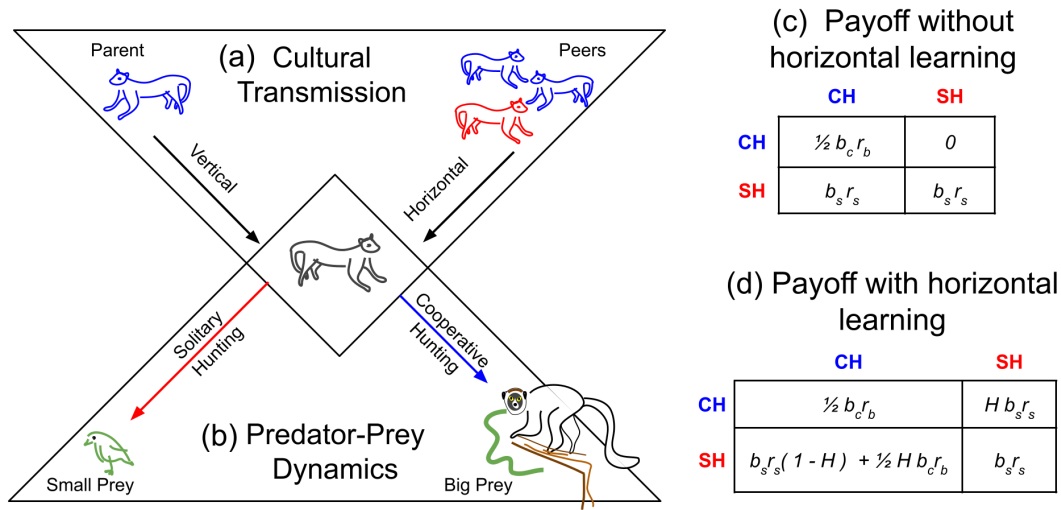

Figure 1: An illustration of the model structure. **(a)** The cultural transmission, or social learning dynamics. Individuals learn vertically from their parent (left) and then learn horizontally from other peers (right). **(b)** The predator-prey dynamics of the model. After learning, the predators can hunt cooperatively for the big prey (right) or hunt solitarily for the small prey (bottom). **(c)** The payoff matrix without horizontal learning,  $H = 0$ . **(d)** The payoff matrix with horizontal learning,  $H > 0$ .

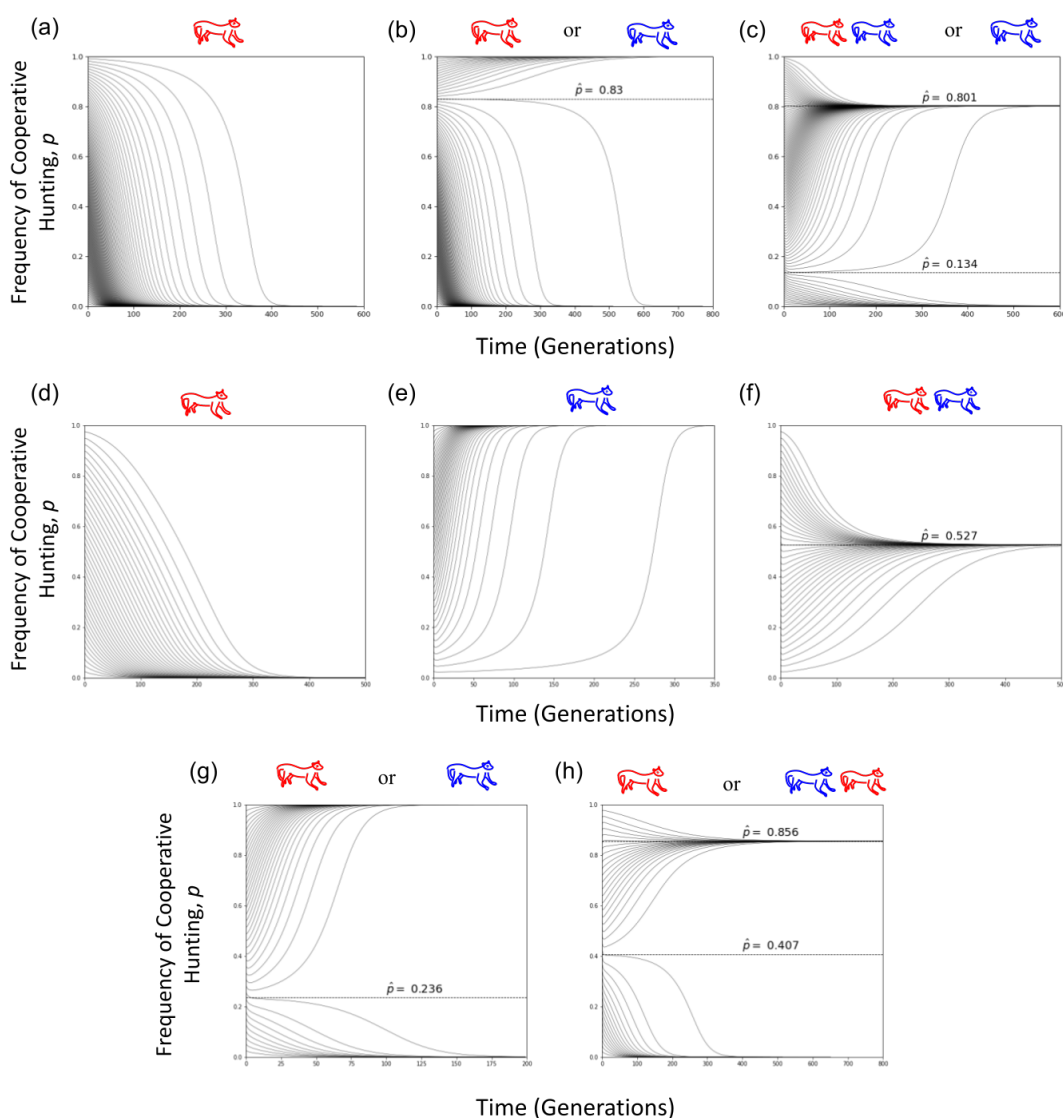

Figure 2: Trajectories of the frequency of cooperative hunting (CH),  $p$ , (y-axis) over time (generations) under vertical transmission only,  $H = 0$  (panels (a) - (c)) or with horizontal transmission  $H > 0$  (panels (d) - (h)). Dotted lines indicate polymorphic equilibria, i.e. both CH and SH are present. The initial prey values are  $r_b^{(0)} = r_s^{(0)} = 1$ , but different initial  $p$  values are chosen in the interval  $0 \leq p \leq 1$ . Changing the initial prey values only changes dynamics for the first few generations. Drawings above graphs illustrate the end behavior of the trajectories, where a red predator alone indicates SH fixes, a blue predator alone represents CH fixing, and a pair of blue and red predators together represent a polymorphic equilibrium. The parameters  $\beta_s$ , depletion of small prey,  $\beta_b$ , depletion of big prey,  $b_s$ , benefit of small prey,  $b_c$ , benefit of CH, and  $H$ , probability of horizontal transmission, written as  $(\beta_s, \beta_b, b_s, b_c, H)$ , are **(a)** (0.2, 0.1, 0.1, 0.201, 0), **(b)** (0.2, 0.1, 0.1, 0.25, 0), **(c)** (0.9, 0.6, 0.15, 0.5, 0), **(d)** (0.5, 0.4, 0.09, 0.2, 0.1), **(e)** (0.5, 0.2, 0.2, 0.8, 0.25), **(f)** (0.5, 0.4, 0.2, 0.45, 0.5), **(g)** (0.5, 0.2, 0.2, 0.8, 0.1), and **(h)** (0.5, 0.3, 0.3, 0.8, 0.25).

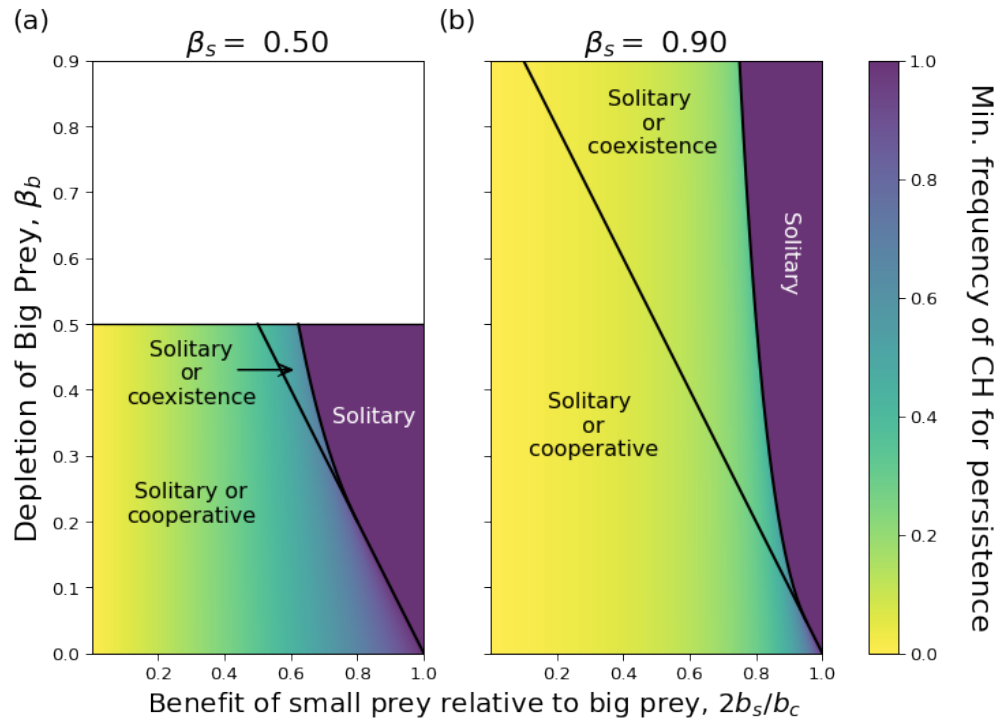

Figure 3: Without horizontal learning,  $H = 0$ , the minimum frequency of cooperative hunting (CH) such that CH persists (i.e. the minimum polymorphic equilibrium  $\min(\hat{p})$ ) decreases if depletion of small,  $\beta_s$ , is high and the benefit of small relative to BP,  $2b_s/b_c$ , is low. The minimum equilibrium  $\min(\hat{p})$  is shown for the small prey depletion constants (a)  $\beta_s = 0.5$ , and (b)  $\beta_s = 0.9$ . In the region labeled "Solitary or cooperative", there is only one polymorphic equilibrium, which is unstable. In the region labeled "Solitary or coexistence" there are two polymorphic equilibria, and the one with the smaller  $\hat{p}$  value is unstable. In the region labeled "Solitary", for any starting frequency of CH,  $p < 1$ , CH will disappear from the population, i.e.  $\min(\hat{p}) = 1$ .

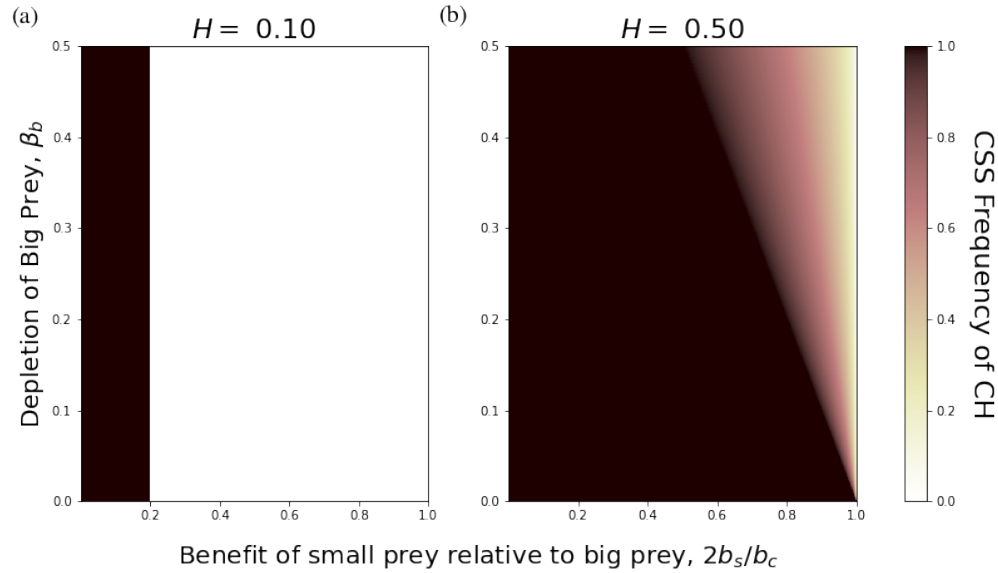

Figure 4: The convergent stable strategy, or CSS, of the frequency of cooperative hunting (shown by the color) versus the benefit ratio of solitary hunting to cooperative hunting,  $2b_s/b_c$  (x-axis) and the depletion of the big prey,  $\beta_b$  (y-axis), for depletion of small prey  $\beta_s = 0.5$  and horizontal transmission probabilities **A**)  $H = 0.1$  and **B**)  $H = 0.5$ . Cooperative hunting fixes in the black region and is lost in the white region.
